# Supplementary material
Source: PubMed Central journal article supplement (PMC9045958)
Supplement: NIHMS1627202-supplement-Appendices_1-10.pdf [file NIHMS1627202-supplement-Appendices_1-10.pdf]

**Appendix 1. Histogram of surgical volume for 116 JGOG sites. Consecutive cases of radical hysterectomy performed for clinical stage IB1-IIIB cervical cancer between 2004 and 2008 are shown based on number (large to small). The median number of radical hysterectomy over five-year study duration was 44 (interquartile range, 17-65). RH, radical hysterectomy; JGOG, Japanese Gynecologic Oncology Group.**



Matsuo K, Shimada M, Yamaguchi S, Matoda M, Nakanishi T, Kikkawa F, et al. Association of radical hysterectomy surgical volume and survival for early-stage cervical cancer. *Obstet Gynecol* 2019;133. The authors provided this information as a supplement to their article.

## Appendix 2. Adjusting Model 1 (Unadjusted Baseline)

| Characteristic            | Disease-free survival |                  | Overall survival    |              | Local-recurrence    |                  | Distant-recurrence  |              |
|---------------------------|-----------------------|------------------|---------------------|--------------|---------------------|------------------|---------------------|--------------|
|                           | HR (95%CI)            | P-value          | HR (95%CI)          | P-value      | HR (95%CI)          | P-value          | HR (95%CI)          | P-value      |
| All cases (pre-matching)  |                       |                  |                     |              |                     |                  |                     |              |
| Mid-volume                | 1                     |                  | 1                   |              | 1                   |                  | 1                   |              |
| High-volume               | 0.743 (0.642-0.860)   | <b>&lt;0.001</b> | 0.844 (0.707-1.008) | 0.061        | 0.667 (0.548-0.813) | <b>&lt;0.001</b> | 0.915 (0.757-1.106) | 0.359        |
| Low-volume                | 1.209 (1.011-1.446)   | <b>0.038</b>     | 0.995 (0.780-1.269) | 0.968        | 1.016 (0.794-1.298) | 0.902            | 1.157 (0.901-1.488) | 0.252        |
| All cases (post-matching) |                       |                  |                     |              |                     |                  |                     |              |
| mid-/low-volume           | 1                     |                  | 1                   |              | 1                   |                  | 1                   |              |
| High-volume               | 0.681 (0.577-0.803)   | <b>&lt;0.001</b> | 0.773 (0.637-0.937) | <b>0.009</b> | 0.635 (0.509-0.793) | <b>&lt;0.001</b> | 0.795 (0.642-0.986) | <b>0.037</b> |
| Stage IB1 disease*        |                       |                  |                     |              |                     |                  |                     |              |
| Mid-volume                | 1                     |                  | 1                   |              | 1                   |                  | 1                   |              |
| High-volume               | 0.567 (0.355-0.906)   | <b>0.018</b>     | 0.503 (0.241-1.051) | 0.068        | 0.495 (0.290-0.846) | <b>0.010</b>     | 0.705 (0.312-1.592) | 0.401        |
| Low-volume                | 0.944 (0.524-1.703)   | 0.849            | 0.330 (0.079-1.374) | 0.128        | 0.941 (0.496-1.785) | 0.851            | 0.513 (0.120-2.190) | 0.368        |
| Stage IIB disease         |                       |                  |                     |              |                     |                  |                     |              |
| Mid-volume                | 1                     |                  | 1                   |              | 1                   |                  | 1                   |              |
| High-volume               | 0.764 (0.598-0.977)   | <b>0.032</b>     | 0.928 (0.706-1.221) | 0.594        | 0.761 (0.550-1.053) | <b>0.099</b>     | 0.902 (0.659-1.236) | 0.522        |
| Low-volume                | 1.008 (0.743-1.369)   | 0.958            | 0.943 (0.649-1.370) | 0.759        | 0.775 (0.497-1.210) | 0.262            | 1.016 (0.675-1.529) | 0.940        |
| Node-positive case        |                       |                  |                     |              |                     |                  |                     |              |
| Mid-volume                | 1                     |                  | 1                   |              | 1                   |                  | 1                   |              |
| High-volume               | 0.778 (0.637-0.951)   | <b>0.014</b>     | 0.898 (0.718-1.123) | 0.346        | 0.694 (0.521-0.926) | <b>0.013</b>     | 0.930 (0.732-1.182) | 0.553        |
| Low-volume                | 1.020 (0.787-1.322)   | 0.881            | 1.005 (0.742-1.359) | 0.976        | 0.971 (0.677-1.394) | 0.875            | 0.957 (0.685-1.335) | 0.794        |

Association for surgical volume and survival outcome was adjusted for preoperative factors: age (continuous), year of diagnosis (2004, 2005, 2006, 2007, and 2008), and histology (squamous *versus* non-squamous). Cox proportional hazard regression models were used for analysis. Significant *P*-values are emboldened. \*Clinical stage IB1 disease without preoperative / postoperative chemotherapy / radiotherapy. Abbreviations: HR, hazard ratio; and CI, confidence interval.

Matsuo K, Shimada M, Yamaguchi S, Matoda M, Nakanishi T, Kikkawa F, et al. Association of radical hysterectomy surgical volume and survival for early-stage cervical cancer. *Obstet Gynecol* 2019;133.

The authors provided this information as a supplement to their article.

©2019 American College of Obstetricians and Gynecologists.

### Appendix 3. Adjusting Model 2 (Pretreatment Factors)

| Characteristic            | Disease-free survival |                  | Overall survival    |              | Local-recurrence    |                  | Distant-recurrence  |              |
|---------------------------|-----------------------|------------------|---------------------|--------------|---------------------|------------------|---------------------|--------------|
|                           | HR (95%CI)            | P-value          | HR (95%CI)          | P-value      | HR (95%CI)          | P-value          | HR (95%CI)          | P-value      |
| All cases (pre-matching)  |                       |                  |                     |              |                     |                  |                     |              |
| Mid-volume                | 1                     |                  | 1                   |              | 1                   |                  | 1                   |              |
| High-volume               | 0.752 (0.649-0.871)   | <b>&lt;0.001</b> | 0.862 (0.727-1.022) | 0.086        | 0.677 (0.555-0.825) | <b>&lt;0.001</b> | 0.926 (0.765-1.120) | 0.426        |
| Low-volume                | 1.225 (1.024-1.466)   | <b>0.027</b>     | 0.986 (0.778-1.251) | 0.908        | 1.014 (0.792-1.298) | 0.912            | 1.184 (0.921-1.522) | 0.187        |
| All cases (post-matching) |                       |                  |                     |              |                     |                  |                     |              |
| mid-/low-volume           | 1                     |                  | 1                   |              | 1                   |                  | 1                   |              |
| High-volume               | 0.679 (0.575-0.801)   | <b>&lt;0.001</b> | 0.771 (0.636-0.935) | <b>0.008</b> | 0.633 (0.506-0.790) | <b>&lt;0.001</b> | 0.797 (0.643-0.988) | <b>0.038</b> |
| Stage IB1 disease*        |                       |                  |                     |              |                     |                  |                     |              |
| Mid-volume                | 1                     |                  | 1                   |              | 1                   |                  | 1                   |              |
| High-volume               | 0.588 (0.367-0.940)   | <b>0.027</b>     | 0.482 (0.230-1.011) | 0.054        | 0.509 (0.297-0.871) | <b>0.014</b>     | 0.729 (0.322-1.653) | 0.449        |
| Low-volume                | 0.932 (0.515-1.686)   | 0.816            | 0.357 (0.085-1.492) | 0.158        | 0.934 (0.491-1.777) | 0.835            | 0.530 (0.124-2.269) | 0.392        |
| Stage IIB disease         |                       |                  |                     |              |                     |                  |                     |              |
| Mid-volume                | 1                     |                  | 1                   |              | 1                   |                  | 1                   |              |
| High-volume               | 0.803 (0.627-1.028)   | 0.081            | 0.971 (0.732-1.286) | 0.835        | 0.798 (0.576-1.105) | 0.174            | 0.945 (0.688-1.296) | 0.724        |
| Low-volume                | 1.068 (0.785-1.453)   | 0.676            | 1.021 (0.697-1.496) | 0.913        | 0.825 (0.528-1.290) | 0.400            | 1.027 (0.681-1.549) | 0.899        |
| Node-positive case        |                       |                  |                     |              |                     |                  |                     |              |
| Mid-volume                | 1                     |                  | 1                   |              | 1                   |                  | 1                   |              |
| High-volume               | 0.790 (0.646-0.966)   | <b>0.021</b>     | 0.926 (0.738-1.162) | 0.507        | 0.713 (0.534-0.951) | <b>0.021</b>     | 0.934 (0.734-1.188) | 0.577        |
| Low-volume                | 1.038 (0.800-1.347)   | 0.776            | 1.056 (0.777-1.435) | 0.728        | 0.969 (0.674-1.392) | 0.864            | 0.964 (0.690-1.346) | 0.829        |

Association for surgical volume and survival outcome was adjusted for pretreatment factors: age (continuous), year of diagnosis (2004, 2005, 2006, 2007, and 2008), and histology (squamous *versus* non-squamous). Cox proportional hazard regression models were used for analysis. Significant *P*-values are emboldened. \*Clinical stage IB1 disease without preoperative / postoperative chemotherapy / radiotherapy. Abbreviations: HR, hazard ratio; and CI, confidence interval.

Matsuo K, Shimada M, Yamaguchi S, Matoda M, Nakanishi T, Kikkawa F, et al. Association of radical hysterectomy surgical volume and survival for early-stage cervical cancer. *Obstet Gynecol* 2019;133.

The authors provided this information as a supplement to their article.

©2019 American College of Obstetricians and Gynecologists.

#### Appendix 4. Adjusting Model 3 (Pretreatment Factors and Surgical-Pathological Results)

| Characteristic            | Disease-free survival |                  | Overall survival    |                 | Local-recurrence    |                  | Distant-recurrence  |                 |
|---------------------------|-----------------------|------------------|---------------------|-----------------|---------------------|------------------|---------------------|-----------------|
|                           | HR (95%CI)            | <i>P</i> -value  | HR (95%CI)          | <i>P</i> -value | HR (95%CI)          | <i>P</i> -value  | HR (95%CI)          | <i>P</i> -value |
| All cases (pre-matching)  |                       |                  |                     |                 |                     |                  |                     |                 |
| Mid-volume                | 1                     |                  | 1                   |                 | 1                   |                  | 1                   |                 |
| High-volume               | 0.685 (0.583-0.804)   | <b>&lt;0.001</b> | 0.717 (0.587-0.875) | <b>0.001</b>    | 0.624 (0.503-0.774) | <b>&lt;0.001</b> | 0.820 (0.665-1.012) | 0.064           |
| Low-volume                | 1.136 (0.937-1.377)   | 0.195            | 0.961 (0.738-1.250) | 0.767           | 1.004 (0.773-1.303) | 0.978            | 0.928 (0.700-1.230) | 0.603           |
| All cases (post-matching) |                       |                  |                     |                 |                     |                  |                     |                 |
| mid-/low-volume           | 1                     |                  | 1                   |                 | 1                   |                  | 1                   |                 |
| High-volume               | 0.683 (0.569-0.820)   | <b>&lt;0.001</b> | 0.733 (0.584-0.920) | <b>0.008</b>    | 0.634 (0.497-0.808) | <b>&lt;0.001</b> | 0.784 (0.817-0.998) | <b>0.048</b>    |
| Stage IB1 disease*        |                       |                  |                     |                 |                     |                  |                     |                 |
| Mid-volume                | 1                     |                  | 1                   |                 | 1                   |                  | 1                   |                 |
| High-volume               | 0.496 (0.295-0.833)   | <b>0.008</b>     | 0.351 (0.151-0.815) | <b>0.015</b>    | 0.445 (0.246-0.806) | <b>0.008</b>     | 0.538 (0.222-1.308) | 0.171           |
| Low-volume                | 1.009 (0.545-1.866)   | 0.977            | 0.343 (0.081-1.458) | 0.147           | 0.989 (0.506-1.934) | 0.974            | 0.540 (0.125-2.339) | 0.410           |
| Stage IIB disease         |                       |                  |                     |                 |                     |                  |                     |                 |
| Mid-volume                | 1                     |                  | 1                   |                 | 1                   |                  | 1                   |                 |
| High-volume               | 0.734 (0.556-0.970)   | <b>0.030</b>     | 0.824 (0.599-1.134) | 0.235           | 0.657 (0.455-0.947) | <b>0.024</b>     | 0.880 (0.613-1.263) | 0.487           |
| Low-volume                | 0.967 (0.691-1.353)   | 0.844            | 0.981 (0.653-1.474) | 0.926           | 0.780 (0.485-1.254) | 0.305            | 0.883 (0.552-1.410) | 0.602           |
| Node-positive case        |                       |                  |                     |                 |                     |                  |                     |                 |
| Mid-volume                | 1                     |                  | 1                   |                 | 1                   |                  | 1                   |                 |
| High-volume               | 0.738 (0.592-0.920)   | <b>0.007</b>     | 0.762 (0.591-0.984) | <b>0.037</b>    | 0.630 (0.459-0.864) | <b>0.004</b>     | 0.890 (0.682-1.162) | 0.391           |
| Low-volume                | 0.928 (0.703-1.223)   | 0.595            | 0.966 (0.698-1.337) | 0.835           | 0.883 (0.800-1.299) | 0.528            | 0.822 (0.569-1.187) | 0.296           |

Association for surgical volume and survival outcome was adjusted for pretreatment factors (Table S1) and surgical pathological factors: pelvic lymph node metastasis (yes *versus* no), para-aortic lymph node metastasis (yes, no, or not examined), parametrial involvement (yes *versus* no), deep stromal invasion (yes *versus* no), LVSI (yes *versus* no), tumor size (>4 *versus* ≤4 cm), uterine corpus invasion (yes *versus* no), ovarian metastasis (yes *versus* no), and malignant peritoneal cytology (yes, no, or not examined). Cox proportional hazard regression models were used for analysis. Significant *P*-values are emboldened. \*Clinical stage IB1 disease without preoperative / postoperative chemotherapy / radiotherapy. Abbreviations: HR, hazard ration; and CI, confidence interval.

Matsuo K, Shimada M, Yamaguchi S, Matoda M, Nakanishi T, Kikkawa F, et al. Association of radical hysterectomy surgical volume and survival for early-stage cervical cancer. *Obstet Gynecol* 2019;133.

The authors provided this information as a supplement to their article.

©2019 American College of Obstetricians and Gynecologists.

### Appendix 5. Association of Surgical Volume and Survival in Cervical Cancer (Adjusting Model 3).

| Characteristic           | Disease-free survival |                  | Overall survival    |              | Local-recurrence    |                  | Distant-recurrence  |         |
|--------------------------|-----------------------|------------------|---------------------|--------------|---------------------|------------------|---------------------|---------|
|                          | HR (95%CI)            | P-value          | HR (95%CI)          | P-value      | HR (95%CI)          | P-value          | HR (95%CI)          | P-value |
| All cases (pre-matching) |                       |                  |                     |              |                     |                  |                     |         |
| Mid-volume               | 1                     |                  | 1                   |              | 1                   |                  | 1                   |         |
| High-volume              | 0.704 (0.590-0.840)   | <b>&lt;0.001</b> | 0.744 (0.603-0.919) | <b>0.006</b> | 0.632 (0.500-0.799) | <b>&lt;0.001</b> | 0.857 (0.678-1.082) | 0.194   |
| Low-volume               | 1.137 (0.928-1.392)   | 0.215            | 0.879 (0.667-1.158) | 0.358        | 0.969 (0.737-1.275) | 0.823            | 0.966 (0.717-1.302) | 0.820   |

Association for surgical volume and survival outcome was adjusted for pretreatment factors, surgical-pathological results, and treatment types (adjusting model 3). Pretreatment factors: age (continuous), year of diagnosis (2004, 2005, 2006, 2007, and 2008), and histology (squamous *versus* non-squamous). Surgical-pathological factors: pelvic lymph node metastasis (yes *versus* no), para-aortic lymph node metastasis (yes, no, or not examined), parametrial involvement (yes *versus* no), deep stromal invasion (yes *versus* no), LVSI (yes *versus* no), tumor size (>4 *versus* ≤4 cm), uterine corpus invasion (yes *versus* no), ovarian metastasis (yes *versus* no), and malignant peritoneal cytology (yes, no, or not examined). Treatment types: number of sampled pelvic lymph nodes (continuous), neoadjuvant chemotherapy (yes *versus* no), and adjuvant therapy (radiation-based, chemotherapy-based, or none). Cox proportional hazard regression models were used for analysis. Proportional hazard assumption was tested and showed no interaction with time. Significant *P*-values are emboldened. \*Clinical stage IB1 disease without preoperative / postoperative chemotherapy / radiotherapy. Abbreviations: HR, hazard ratio; and CI, confidence interval.

Matsuo K, Shimada M, Yamaguchi S, Matoda M, Nakanishi T, Kikkawa F, et al. Association of radical hysterectomy surgical volume and survival for early-stage cervical cancer. *Obstet Gynecol* 2019;133.

The authors provided this information as a supplement to their article.

©2019 American College of Obstetricians and Gynecologists.

### Appendix 6. Association of Surgical Volume and Survival in Cervical Cancer (Adjusting Model 3).

| Characteristic           | Disease-free survival |                  | Overall survival    |              | Local-recurrence    |                  | Distant-recurrence  |         |
|--------------------------|-----------------------|------------------|---------------------|--------------|---------------------|------------------|---------------------|---------|
|                          | HR (95%CI)            | P-value          | HR (95%CI)          | P-value      | HR (95%CI)          | P-value          | HR (95%CI)          | P-value |
| All cases (pre-matching) |                       |                  |                     |              |                     |                  |                     |         |
| Mid-volume               | 1                     |                  | 1                   |              | 1                   |                  | 1                   |         |
| High-volume              | 0.730 (0.623-0.857)   | <b>&lt;0.001</b> | 0.726 (0.596-0.885) | <b>0.002</b> | 0.643 (0.518-0.797) | <b>&lt;0.001</b> | 0.850 (0.684-1.055) | 0.141   |
| Low-volume               | 1.084 (0.893-1.316)   | 0.415            | 0.858 (0.658-1.118) | 0.256        | 0.972 (0.749-1.260) | 0.828            | 0.899 (0.673-1.201) | 0.471   |

Treatment initiating date either with surgery or neoadjuvant therapy was used. Association for surgical volume and survival outcome was adjusted for pretreatment factors, surgical-pathological results, and treatment types (adjusting model 3). Pretreatment factors: age (continuous), year of diagnosis (2004, 2005, 2006, 2007, and 2008), and histology (squamous *versus* non-squamous). Surgical-pathological factors: pelvic lymph node metastasis (yes *versus* no), para-aortic lymph node metastasis (yes, no, or not examined), parametrial involvement (yes *versus* no), deep stromal invasion (yes *versus* no), LVSI (yes *versus* no), tumor size (>4 *versus* ≤4 cm), uterine corpus invasion (yes *versus* no), ovarian metastasis (yes *versus* no), and malignant peritoneal cytology (yes, no, or not examined). Treatment types: number of sampled pelvic lymph nodes (continuous), neoadjuvant chemotherapy (yes *versus* no), and adjuvant therapy (radiation-based, chemotherapy-based, or none). Cox proportional hazard regression models were used for analysis. Proportional hazard assumption was tested and showed no interaction with time. Significant *P*-values are emboldened. \*Clinical stage IB1 disease without preoperative / postoperative chemotherapy / radiotherapy. Abbreviations: HR, hazard ration; and CI, confidence interval.

Matsuo K, Shimada M, Yamaguchi S, Matoda M, Nakanishi T, Kikkawa F, et al. Association of radical hysterectomy surgical volume and survival for early-stage cervical cancer. *Obstet Gynecol* 2019;133.

The authors provided this information as a supplement to their article.

©2019 American College of Obstetricians and Gynecologists.

**Appendix 7. Standardized difference for propensity score matching. Standardized difference before and after propensity score matching is shown. The value of  $\leq 0.10$  indicates good balance between the two groups. DSI, deep stromal invasion; LVSI, lymphovascular space invasion; NACT, neoadjuvant chemotherapy; and mets, metastasis.**



Matsuo K, Shimada M, Yamaguchi S, Matoda M, Nakanishi T, Kikkawa F, et al. Association of radical hysterectomy surgical volume and survival for early-stage cervical cancer. *Obstet Gynecol* 2019;133. The authors provided this information as a supplement to their article.

### Appendix 8. Interaction of Surgical Volume and Adjuvant Therapy for Survival

| Characteristic    | Disease-free survival |                 | Overall survival    |                 | Local-recurrence    |                 | Distant-recurrence  |                 |
|-------------------|-----------------------|-----------------|---------------------|-----------------|---------------------|-----------------|---------------------|-----------------|
|                   | HR (95%CI)            | <i>P</i> -value | HR (95%CI)          | <i>P</i> -value | HR (95%CI)          | <i>P</i> -value | HR (95%CI)          | <i>P</i> -value |
| High-volume       |                       |                 |                     |                 |                     |                 |                     |                 |
| Radiotherapy      | 1                     |                 | 1                   |                 | 1                   |                 | 1                   |                 |
| Chemotherapy      | 0.678 (0.395-1.165)   | 0.160           | 0.947 (0.541-1.660) | 0.850           | 1.099 (0.516-2.340) | 0.807           | 0.564 (0.295-1.076) | 0.082           |
| Mid- / Low-volume |                       |                 |                     |                 |                     |                 |                     |                 |
| Radiotherapy      | 1                     |                 | 1                   |                 | 1                   |                 | 1                   |                 |
| Chemotherapy      | 1.131 (0.853-1.500)   | 0.391           | 1.059 (0.762-1.472) | 0.734           | 1.664 (1.140-2.430) | <b>0.008</b>    | 0.662 (0.447-0.978) | <b>0.038</b>    |

Examined women with pelvic lymph node positive who received radiotherapy (whole pelvic alone or concurrent chemo-radiotherapy) or systemic chemotherapy alone. Women who received neoadjuvant therapy were excluded. Cox proportional hazard regression model for *P*-values. Association of surgical volume and adjuvant therapy type was adjusted for histology, parametrial involvement, and lymph node ratio. Significant *P*-values are emboldened. Abbreviations: HR, hazard ratio; CI, confidence interval.

Matsuo K, Shimada M, Yamaguchi S, Matoda M, Nakanishi T, Kikkawa F, et al. Association of radical hysterectomy surgical volume and survival for early-stage cervical cancer. *Obstet Gynecol* 2019;133.

The authors provided this information as a supplement to their article.

©2019 American College of Obstetricians and Gynecologists.

**Appendix 9. Association of Surgical Volume and Local-Recurrence Risk (Stage IB1 Disease, n=1,700)**

| RH over 5 years | Number | HR (95%CI)          |              |
|-----------------|--------|---------------------|--------------|
|                 |        | versus 20-29 cases  | P-value      |
| <10 cases       | 237    | 0.915 (0.474-1.763) | 0.790        |
| 10-19 cases     | 441    | 0.651 (0.356-1.194) | 0.165        |
| 20-29 cases     | 313    | 1                   |              |
| 30-49 cases     | 360    | 0.875 (0.485-1.581) | 0.875        |
| ≥50 cases       | 349    | 0.460 (0.227-0.929) | <b>0.030</b> |

1,700 women with clinical stage IB1 cervical cancer who underwent primary RH without neoadjuvant therapy or postoperative therapy were examined. Surgical volume for RH per institution during the study period (5 years) was arbitrary grouped every 10-20 cases. Association for surgical volume and cumulative local-recurrence risk was examined with a Cox proportional hazard regression model. Significant P-values are emboldened. Abbreviations: RH, radical hysterectomy; HR, hazard ration; and CI, confidence interval.

## Appendix 10. Proportion of Institutions Crossed Over the Groups

| Intragroup crossover | Low-volume | Mid-volume | High-volume |
|----------------------|------------|------------|-------------|
| No                   | 28 (61%)   | 22 (36.7%) | 4 (40%)     |
| Yes                  | 18 (39%)   | 38 (63.3%) | 6 (60%)     |
| Total                | 46 sites   | 60 sites   | 10 sites    |

Each institution grouped as low-volume group, mid-volume group, and high-volume group based on the 5-year surgical volume was assessed surgical volume in each calendar year for five years during study window of 2004-2008. Based on the cutoff surgical cases over 5-year period (Figure 1), we arbitrary used the annual cutoff of surgical volume as: low-volume ( $\leq 6$  surgeries per year), mid-volume (7-20 surgeries per year), and high-volume ( $\geq 21$  surgeries per year). In intergroup variability was assessed in each given calendar year. Institutions remained as the assigned group based on the 5-year surgical volume definition was allocated as no intergroup crossover whereas institutions changed the case number to different category was allocated as intergroup crossover.
